# Supplementary material
Source: Springer Nature journal article supplement (https://www.springermedizin.de/resource/supplementary/12982_2005_22_MOESM2_ESM.pdf/9604320)
Supplement: MOESM2 [file 9604320]

MALES

FEMALES

Injury and Poisoning

Rate per 1000

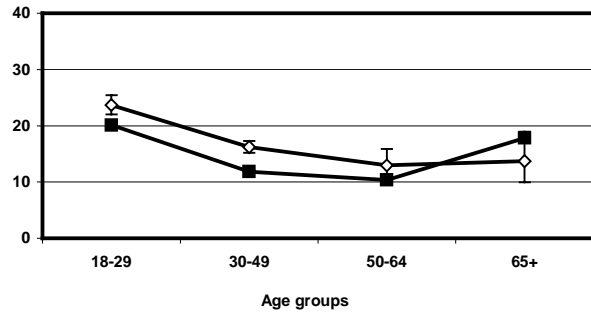

Rate per 1000

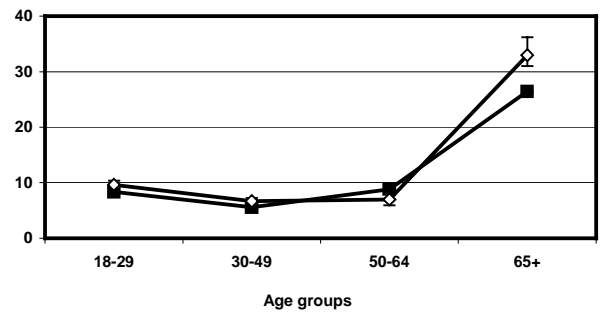

Infectious and Parasitic Diseases

Rate per 1000

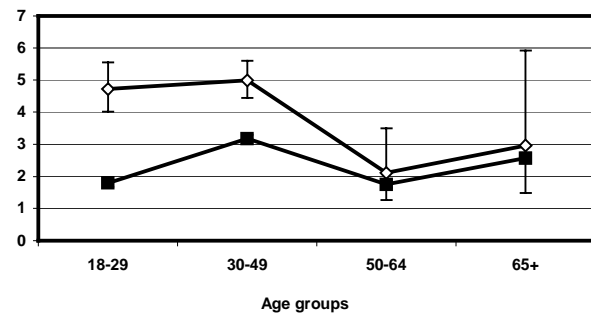

Rate per 1000

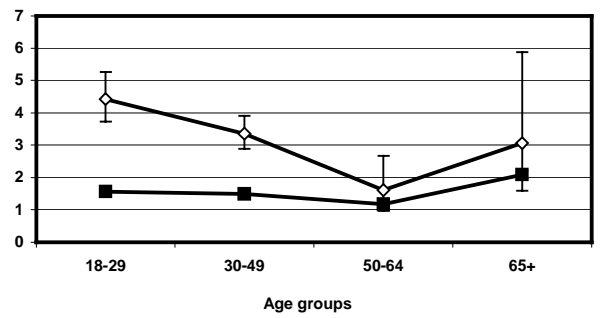

Symptoms, Signs and Ill-Defined Conditions

Rate per 1000

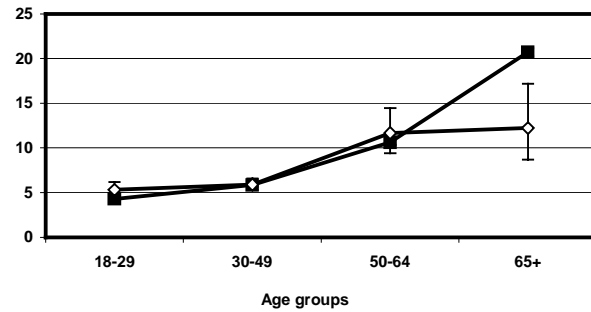

Rate per 1000

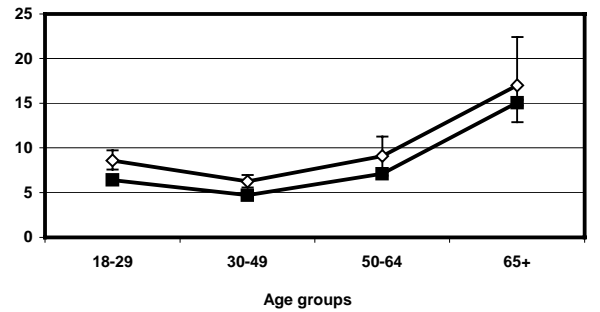

Pregnancy, Childbirth and Puerperium

Rate per 1000

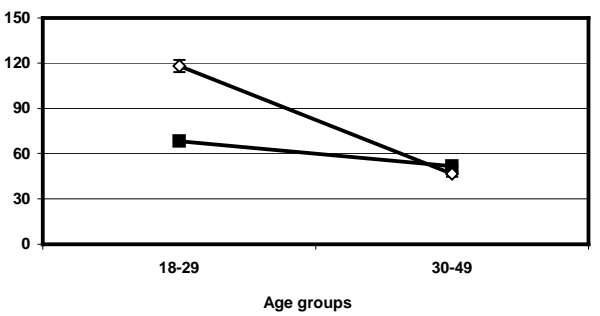

RESIDENTS LDCs
